# Supplementary material for: Expression of Syk and MAP4 proteins in ovarian cancer
Source: J Cancer Res Clin Oncol. 2019 Feb 8;145(4):909–19. doi: 10.1007/s00432-019-02856-9 (PMC6435630; doi:10.1007/s00432-019-02856-9)
Supplement: Supplementary file 1 — Supplementary material 1 (PDF 388 KB) [file 432_2019_2856_MOESM1_ESM.pdf]

# **Expression of Syk and MAP4 proteins in ovarian cancer**

Siwei Zhang<sup>1</sup>, Suha Deen<sup>2</sup>, Sarah J Storr<sup>1</sup>, Anqi Yao<sup>1</sup>, Stewart G Martin<sup>1,3</sup>

1 Academic Clinical Oncology, Nottingham Breast Cancer Research Centre, School of Medicine, University of Nottingham, Nottingham University Hospitals NHS Trust, City Hospital Campus, Nottingham, NG5 1PB, UK.

2 Department of Pathology, Queen's Medical Centre, Nottingham University Hospital, Nottingham, NG7 2UH, UK

3 Corresponding author: Academic Clinical Oncology, Nottingham Breast Cancer Research Centre, School of Medicine, University of Nottingham, Nottingham University Hospitals NHS Trust, City Hospital Campus, Nottingham, NG5 1PB, UK

Telephone: +44(0)115 823 1846

Email: [stewart.martin@nottingham.ac.uk](mailto:stewart.martin@nottingham.ac.uk).

## Supplements

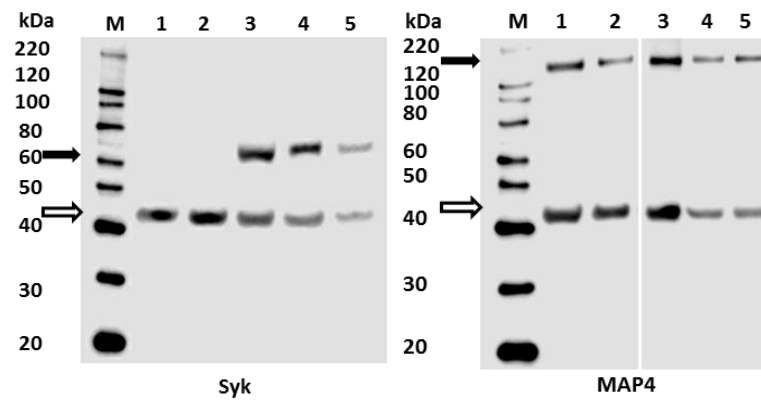

**Fig. S1 The specificity of anti-Syk and anti-MAP4 antibody.** Syk and MAP4 expression across the panel of ovarian cancer cell lines were detected by Western blotting analysis. Primary antibodies were diluted in 1:1000 dilution. A single band corresponding to the molecular mass of the intended target was observed in the Western blotting studies which indicated the specificity of both anti-MAP4 (BETHYL LABORATORIES, UK) and anti-Syk (Thermo Fisher SCIENTIFIC, UK) antibody. Figures present the representative blots of 2 independent experiments with lysates from cells with different passage numbers. Open arrows indicate  $\beta$ -actin (42 kDa) which was used as the loading control. Black arrows indicate Syk (72 kDa) and MAP4 (210 kDa), respectively. Lane M: Protein marker, Lane 1: A2780, Lane 2: A2780-cis, Lane 3: SKOV3, Lane 4: PEO1, and Lane 5: PEO4.

Table S1 The association between protein expression and tumour stage

| Variable                                               | Syk-c      |             |              | Syk-n       |             |              | MAP4        |             |                 |
|--------------------------------------------------------|------------|-------------|--------------|-------------|-------------|--------------|-------------|-------------|-----------------|
|                                                        | Low        | High        | P-value      | Low         | High        | P-value      | Low         | High        | P-value         |
| <b>Stage</b>                                           |            |             |              |             |             |              |             |             |                 |
| <b>Tumour confined to ovaries (stage 1)</b>            | 36(8.3%)   | 123 (28.3%) | <b>0.002</b> | 50 (11.5%)  | 109 (25.1%) | <b>0.041</b> | 75 (17.2%)  | 89 (20.5%)  | <b>0.000087</b> |
| <b>Tumour spread out of ovaries (stage 2, 3 and 4)</b> | 31 (7.1%)  | 244 (56.2%) |              | 62 (14.3%)  | 213 (49.1%) |              | 74 (17.0%)  | 197 (45.3%) |                 |
| <b>Stage</b>                                           |            |             |              |             |             |              |             |             |                 |
| <b>Without distant metastasis (stage 1,2 and 3)</b>    | 62 (14.3%) | 341 (78.6%) | 0.912        | 104 (24.0%) | 299 (68.9%) | 1.000        | 139 (32.0%) | 265 (60.9%) | 0.808           |
| <b>Distant metastasis occurred (stage 4)</b>           | 5 (1.2%)   | 26 (6.0%)   |              | 8 (1.8%)    | 23 (5.3%)   |              | 10 (2.3%)   | 21 (4.8%)   |                 |

Significant *P* values are indicated by bold font.

**Table S2 P values from the log-rank test of overall survival in different subgroups**

| Variables                                           | P value |                 |              |
|-----------------------------------------------------|---------|-----------------|--------------|
|                                                     | MAP4    | Cytoplasmic Syk | Nuclear Syk  |
| <b>Histological subtypes</b>                        |         |                 |              |
| High grade serous carcinoma                         | 0.699   | 0.581           | 0.506        |
| Mucinous carcinoma                                  | 0.791   | 0.026           | 0.115        |
| Endometrioid carcinoma                              | 0.110   | 0.188           | 0.006        |
| Clear-cell carcinoma                                | 0.988   | 0.822           | 0.453        |
| Low grade serous carcinoma                          | 0.212   | 0.549           | 0.196        |
| <b>Stage</b>                                        |         |                 |              |
| Stage 1 (confined tumour) (n=152)                   | 0.679   | 0.002           | <b>0.001</b> |
| Stage 2, 3 & 4 (tumour spread) (n=269)              | 0.404   | 0.688           | 0.224        |
| <b>Stage</b>                                        |         |                 |              |
| Stage 1, 2 & 3 (without distant metastasis) (n=390) | 0.104   | 0.568           | 0.107        |
| Stage 4 (with distant metastasis) (n=31)            | 0.061   | 0.402           | 0.509        |
| <b>Sensitivity to platinum-based chemotherapy</b>   |         |                 |              |
| Sensitive (n=195)                                   | 0.885   | 0.486           | 0.464        |
| Resistant (n=40)                                    | 0.996   | 0.016           | <b>0.001</b> |
| <b>Residual disease</b>                             |         |                 |              |
| No residual tumour (n=232)                          | 0.867   | 0.054           | <b>0.001</b> |
| residual tumour (n=147)                             | 0.540   | 0.349           | 0.571        |

Significant P values are indicated by bold font.

**Table S3 P values from the log-rank test of overall survival related to combinational protein expression.**

|                                  | Syk-c<br>(P=0.494) | Syk-n<br>(P=0.113) | MAP4<br>(P=0.064) | CXCL4<br>(P=0.031) | CXCR3<br>(P=0.182) |
|----------------------------------|--------------------|--------------------|-------------------|--------------------|--------------------|
| <b>Calpastatin<br/>(P=0.010)</b> | 0.174              | 0.178              | 0.024             | 0.225              | 0.188              |
| <b>Calpain-1<br/>(P=0.153)</b>   | 0.273              | 0.292              | 0.283             | 0.309              | 0.445              |
| <b>Calpain-2<br/>(P=0.026)</b>   | 0.087              | 0.056              | 0.037             | 0.285              | 0.152              |
| <b>Calpain-4<br/>(P=0.003)</b>   | 0.139              | 0.061              | 0.034             | 0.074              | 0.068              |
| <b>Syk-c (P=0.494)</b>           | \                  | 0.424              | 0.220             | 0.358              | 0.468              |
| <b>Syk-n (P=0.113)</b>           | \                  | \                  | 0.112             | 0.166              | 0.208              |
| <b>MAP4 (P=0.064)</b>            | \                  | \                  | \                 | 0.084              | 0.097              |
